# Supplementary material for: Probability Weighting Functions Derived from Hyperbolic Time Discounting: Psychophysical Models and Their Individual Level Testing
Source: Front Psychol. 2016 May 26;7:778. doi: 10.3389/fpsyg.2016.00778 (PMC4881414; doi:10.3389/fpsyg.2016.00778)
Supplement: Supplementary file 1 [file Table1.XLSX]

## Sheet: Sheet1 (9)
Supplementary material 1 Gamble Task in the Experiment
	Probability attached higher outcome
Outcome(Yen)	0.01	0.05	0.1	0.25	0.4	0.5	0.6	0.75	0.9	0.95	0.99
2,500-0	2,500, 1%;0, 99%	2,500,5%; 0, 95%	2,500, 10%; 0, 90%	2,500, 25%; 0, 75%	2,500, 40%; 0, 60%	2,500, 50%; 0, 50%	2,500, 60%; 0, 40%	2,500, 75%; 0, 25%	2,500, 90%; 0, 10%	2,500, 95%; 0, 5%	2,500, 99%; 0, 1%
5,000-0	5,000, 1%; 0, 99%	5,000,5%; 0, 95%	5,000, 10%; 0, 90%	5,000, 25%; 0, 75%	5,000, 40%; 0, 60%	5,000, 50%; 0, 50%	5,000, 60%; 0, 40%	5,000, 75%; 0, 25%	5,000, 90%; 0, 10%	5,000, 95%; 0, 5%	5,000, 99%; 0, 1%
7,500-0	7,500, 1%; 0, 99%	7,500,5%; 0, 95%	7,500, 10%; 0, 90%	7,500, 25%; 0, 75%	7,500, 40%; 0, 60%	7,500, 50%; 0, 50%	7,500, 60%; 0, 40%	7,500, 75%; 0, 25%	7,500, 90%; 0, 10%	7,500, 95%; 0, 5%	7,500, 99%; 0, 1%
10,000-0	10,000, 1%; 0, 99%	10,000,5%; 0, 95%	10,000, 10%; 0, 90%	10,000, 25%; 0, 75%	10,000, 40%; 0, 60%	10,000, 50%; 0, 50%	10,000, 60%; 0, 40%	10,000, 75%; 0, 25%	10,000, 90%; 0, 10%	10,000, 95%; 0, 5%	10,000, 99%; 0, 1%
15,000-0	15,000, 1%; 0, 99%	15,000,5%; 0, 95%	15,000, 10%; 0, 90%	15,000, 25%; 0, 75%	15,000, 40%; 0, 60%	15,000, 50%; 0, 50%	15,000, 60%; 0, 40%	15,000, 75%; 0, 25%	15,000, 90%; 0, 10%	15,000, 95%; 0, 5%	15,000, 99%; 0, 1%
20,000-0	20,000, 1%; 0, 99%	20,000,5%; 0, 95%	20,000, 10%; 0, 90%	20,000, 25%; 0, 75%	20,000, 40%; 0, 60%	20,000, 50%; 0, 50%	20,000, 60%; 0, 40%	20,000, 75%; 0, 25%	20,000, 90%; 0, 10%	20,000, 95%; 0, 5%	20,000, 99%; 0, 1%
40,000-0	40,000, 1%; 0, 99%	40,000,5%; 0, 95%	40,000, 10%; 0, 90%	40,000, 25%; 0, 75%	40,000, 40%; 0, 60%	40,000, 50%; 0, 50%	40,000, 60%; 0, 40%	40,000, 75%; 0, 25%	40,000, 90%; 0, 10%	40,000, 95%; 0, 5%	40,000, 99%; 0, 1%
80,000-0	80,000, 1%; 0, 99%	80,000,5%; 0, 95%	80,000, 10%; 0, 90%	80,000, 25%; 0, 75%	80,000, 40%; 0, 60%	80,000, 50%; 0, 50%	80,000, 60%; 0, 40%	80,000, 75%; 0, 25%	80,000, 90%; 0, 10%	80,000 95%; 0, 5%	80,000, 99%; 0, 1%
5,000-2,500	5,000, 1%; 2,500, 99%	5,000,5%; 2,500, 95%	5,000, 10%; 2,500, 90%	50, 25%; 2,500, 75%	5,000, 40%; 2,500, 60%	5,000, 50%; 2,500, 50%	5,000, 60%; 2,500, 40%	5,000, 75%; 2,500, 25%	5,000, 90%; 2,500, 10%	5,000, 95%; 2,500, 5%	5,000, 99%; 2,500, 1%
7,500-5,000	7,500, 1%; 5,000, 99%	7,500,5%; 5,000, 95%	7,500, 10%; 5,000, 90%	75, 25%; 5,000, 75%	7,500, 40%; 5,000, 60%	7,500, 50%; 5,000, 50%	7,500, 60%; 5,000, 40%	7,500, 75%; 5,000, 25%	7,500, 90%; 5,000, 10%	7,500, 95%; 5,000, 5%	7,500, 99%; 5,000, 1%
10,000-5,000	10,000, 1%; 5,000, 99%	10,000,5%; 5,000, 95%	10,000, 10%; 5,000, 90%	100, 25%; 5,000, 75%	10,000, 40%; 5,000, 60%	10,000, 50%; 5,000, 50%	10,000, 60%; 5,000, 40%	10,000, 75%; 5,000, 25%	10,000, 90%; 5,000, 10%	10,000, 95%; 5,000, 5%	10,000, 99%; 5,000, 1%
15,000-5,000	15,000, 1%; 5,000, 99%	15,000,5%; 5,000, 95%	15,000, 10%; 5,000, 90%	150, 25%; 5,000, 75%	15,000, 40%; 5,000, 60%	15,000, 50%; 5,000, 50%	15,000, 60%; 5,000, 40%	15,000, 75%; 5,000, 25%	15,000, 90%; 5,000, 10%	15,000, 95%; 5,000, 5%	15,000, 99%; 5,000, 1%
15,000-10,000	15,000, 1%; 10,000, 99%	15,000,5%; 10,000, 95%	15,000, 10%; 10,000, 90%	150, 25%; 10,000, 75%	15,000, 40%; 10,000, 60%	15,000, 50%; 10,000, 50%	15,000, 60%; 10,000, 40%	15,000, 75%; 10,000, 25%	15,000, 90%; 10,000, 10%	15,000, 95%; 10,000, 5%	15,000, 99%; 10,000, 1%
20,000-10,000	20,000, 1%; 10,000, 99%	20,000,5%; 10,000, 95%	20,000, 10%; 10,000, 90%	200, 25%; 10,000, 75%	20,000, 40%; 10,000, 60%	20,000, 50%; 10,000, 50%	20,000, 60%; 10,000, 40%	20,000, 75%; 10,000, 25%	20,000, 90%; 10,000, 10%	20,000, 95%; 10,000, 5%	20,000, 99%; 10,000, 1%
20,000-15,000	20,000, 1%; 15,000, 99%	20,000,5%; 15,000, 95%	20,000, 10%; 15,000, 90%	200, 25%; 15,000, 75%	20,000, 40%; 10,000, 60%	20,000, 50%; 15,000, 50%	20,000, 60%; 15,000, 40%	20,000, 75%; 15,000, 25%	20,000, 90%; 10,000, 10%	20,000, 95%; 15,000, 5%	20,000, 99%; 15,000, 1%
